# Supplementary material for: Computer-aided design of two novel and super-high energy cage explosives: dodecanitrohexaprismane and hexanitrohexaazaprismane
Source: Royal Society of Chemistry journal article supplement (doi:10.1039/c3ra46625f), 2013-11-27
Supplement: c3ra46625f.pdf [file c3ra46625f.pdf]

## **Supporting Information**

### **Computer-aided design of two novel and super-high energy cage explosives dodecanitrohexaprismane and hexanitrohexaazaprismane**

Qiong Wu, Weihua Zhu\*, Heming Xiao

**Table S1** Selected bond lengths (Å) of DNH1, DNH2, and ONC, and total energies

(a.u.) of DNH1 and DNH2.

|              | DNH1      | DNH2      | ONC                                              |
|--------------|-----------|-----------|--------------------------------------------------|
| C1-C2        | 1.562     | 1.568     | 1.568 (1.567 <sup>a</sup> , 1.563 <sup>b</sup> ) |
| C2-C3        | 1.572     | 1.568     | 1.567                                            |
| C3-C4        | 1.558     | 1.568     | 1.568                                            |
| C1-C8        | 1.554     | 1.563     |                                                  |
| C2-C9        | 1.585     | 1.563     |                                                  |
| C3-C10       | 1.553     | 1.563     |                                                  |
| C4-C11       | 1.593     | 1.563     |                                                  |
| C1-N1        | 1.557     | 1.544     | 1.490 (1.482 <sup>a</sup> , 1.480 <sup>b</sup> ) |
| C2-N2        | 1.538     | 1.544     | 1.490                                            |
| C3-N3        | 1.550     | 1.544     | 1.490                                            |
| C4-N4        | 1.534     | 1.544     | 1.490                                            |
| Total energy | -2918.801 | -2198.814 |                                                  |

<sup>a</sup> The values are from ref 50. <sup>b</sup> The values are from ref 51.

**Table S2** Selected bond lengths (Å) and bond angles (°) of HNHAH.

| Bond lengths |       | Bond angles |       |
|--------------|-------|-------------|-------|
| N1-C2        | 1.474 | N1C2N3      | 124.3 |
| C2-N3        | 1.474 | C2N3C4      | 115.4 |
| N3-C4        | 1.473 | N1C2N9      | 93.2  |
| C4-N5        | 1.473 | O1O2N1N3    | 75.9  |
| N5-C6        | 1.473 | O3O4N3N5    | 76.1  |
| C6-N1        | 1.474 | O5O6N5N1    | 76.0  |
| C2-N13       | 1.518 | O1O2N1N3    | 75.9  |
| C4-N14       | 1.518 | O7O8N9N7    | 75.8  |
| C6-N15       | 1.518 | O9O10N11N9  | 76.1  |
| C8-N16       | 1.518 | O11O12N7N11 | 76.0  |
| C10-N17      | 1.518 | O1O2N1N3    | 75.9  |
| C12-N18      | 1.518 |             |       |

**Table S3** Unit cell parameters of the possible molecular packing of DNH2 in the ten possible space groups

| Space groups                 | <b>Dreiding</b>         |            |                                                 |             |             |                       |                         |           |           |             |
|------------------------------|-------------------------|------------|-------------------------------------------------|-------------|-------------|-----------------------|-------------------------|-----------|-----------|-------------|
|                              | <i>P2<sub>1</sub>/c</i> | <i>P-1</i> | <i>P2<sub>1</sub>2<sub>1</sub>2<sub>1</sub></i> | <i>Pbca</i> | <i>C2/c</i> | <i>P2<sub>1</sub></i> | <i>Pna2<sub>1</sub></i> | <i>C2</i> | <i>CC</i> | <i>Pbcn</i> |
| Z                            | 4                       | 2          | 4                                               | 8           | 8           | 2                     | 4                       | 4         | 4         | 8           |
| <i>E</i> <sup>a</sup>        | 251.37                  | 251.31     | 249.99                                          | 251.59      | 251.38      | 252.47                | 252.23                  | 253.39    | 251.32    | 252.38      |
| $\rho$ (g·cm <sup>-3</sup> ) | 1.932                   | 1.937      | 1.958                                           | 1.917       | 1.939       | 1.913                 | 1.926                   | 1.878     | 1.908     | 1.925       |
| <i>a</i> (Å)                 | 29.77                   | 9.99       | 10.03                                           | 16.64       | 16.83       | 9.85                  | 11.65                   | 17.26     | 15.72     | 31.28       |
| <i>b</i> (Å)                 | 9.92                    | 9.99       | 10.14                                           | 20.17       | 18.89       | 13.11                 | 15.66                   | 10.12     | 11.80     | 11.61       |
| <i>c</i> (Å)                 | 19.47                   | 15.10      | 23.21                                           | 14.37       | 17.59       | 9.81                  | 13.17                   | 14.31     | 13.07     | 13.23       |
| $\alpha$ (deg)               | 90.0                    | 81.5       | 90.0                                            | 90.0        | 90.0        | 90.0                  | 90.0                    | 90.0      | 90.0      | 90.0        |
| $\beta$ (deg)                | 155.4                   | 98.6       | 90.0                                            | 90.0        | 121.4       | 72.7                  | 90.0                    | 80.2      | 89.2      | 90.0        |
| $\gamma$ (deg)               | 90.0                    | 119.7      | 90.0                                            | 90.0        | 90.0        | 90.0                  | 90.0                    | 90.0      | 90.0      | 90.0        |

<sup>a</sup>*E* in kJ·mol<sup>-1</sup>·cell<sup>-1</sup>.

**Table S4** Unit cell parameters of the possible molecular packing of DNH1 in the ten possible space groups

| <b>Dreiding</b>              |                         |            |                                                 |             |             |                       |                         |           |           |             |
|------------------------------|-------------------------|------------|-------------------------------------------------|-------------|-------------|-----------------------|-------------------------|-----------|-----------|-------------|
| Space groups                 | <i>P2<sub>1</sub>/c</i> | <i>P-1</i> | <i>P2<sub>1</sub>2<sub>1</sub>2<sub>1</sub></i> | <i>Pbca</i> | <i>C2/c</i> | <i>P2<sub>1</sub></i> | <i>Pna2<sub>1</sub></i> | <i>C2</i> | <i>CC</i> | <i>Pbcn</i> |
| Z                            | 2                       | 2          | 4                                               | 8           | 8           | 2                     | 4                       | 4         | 4         | 8           |
| <i>E</i> <sup>a</sup>        | 260.09                  | 260.08     | 261.50                                          | 262.53      | 260.91      | 261.63                | 261.30                  | 261.63    | 262.42    | 263.0       |
| $\rho$ (g·cm <sup>-3</sup> ) | 2.138                   | 2.143      | 2.068                                           | 2.053       | 2.123       | 2.083                 | 2.085                   | 2.083     | 2.077     | 2.073       |
| <i>a</i> (Å)                 | 16.11                   | 9.27       | 14.26                                           | 13.27       | 16.11       | 9.35                  | 15.04                   | 9.35      | 15.91     | 32.90       |
| <i>b</i> (Å)                 | 9.26                    | 9.27       | 16.96                                           | 33.10       | 9.27        | 14.88                 | 9.23                    | 15.95     | 11.92     | 9.98        |
| <i>c</i> (Å)                 | 18.58                   | 15.91      | 9.25                                            | 10.26       | 39.04       | 9.25                  | 15.97                   | 17.58     | 19.27     | 13.58       |
| $\alpha$ (deg)               | 90.0                    | 96.3       | 90.0                                            | 90.0        | 90.0        | 90.0                  | 90.0                    | 90.0      | 90.0      | 90.0        |
| $\beta$ (deg)                | 128.7                   | 66.2       | 90.0                                            | 90.0        | 131.7       | 120.4                 | 90.0                    | 122.1     | 142.5     | 90.0        |
| $\gamma$ (deg)               | 90.0                    | 119.7      | 90.0                                            | 90.0        | 90.0        | 90.0                  | 90.0                    | 90.0      | 90.0      | 90.0        |
| <b>Compass</b>               |                         |            |                                                 |             |             |                       |                         |           |           |             |
| Space groups                 | <i>P2<sub>1</sub>/c</i> | <i>P-1</i> | <i>P2<sub>1</sub>2<sub>1</sub>2<sub>1</sub></i> | <i>Pbca</i> | <i>C2/c</i> | <i>P2<sub>1</sub></i> | <i>Pna2<sub>1</sub></i> | <i>C2</i> | <i>CC</i> | <i>Pbcn</i> |
| Z                            | 2                       | 2          | 4                                               | 8           | 8           | 2                     | 4                       | 4         | 4         | 8           |
| <i>E</i> <sup>a</sup>        | -517.4                  | -519.5     | -513.9                                          | -514.5      | -516.7      | -515.9                | -515.8                  | -516.3    | -517.6    | -513.8      |
| $\rho$ (g·cm <sup>-3</sup> ) | 2.595                   | 2.574      | 2.360                                           | 2.490       | 2.565       | 2.470                 | 2.460                   | 2.477     | 2.588     | 2.381       |
| <i>a</i> (Å)                 | 12.64                   | 7.17       | 29.68                                           | 16.97       | 16.65       | 9.11                  | 15.37                   | 17.93     | 9.06      | 35.91       |
| <i>b</i> (Å)                 | 15.54                   | 9.12       | 9.35                                            | 8.90        | 8.72        | 16.45                 | 7.09                    | 7.11      | 15.76     | 7.11        |
| <i>c</i> (Å)                 | 16.96                   | 14.47      | 7.06                                            | 24.59       | 24.95       | 6.98                  | 17.24                   | 15.19     | 13.18     | 15.21       |
| $\alpha$ (deg)               | 90.0                    | 89.5       | 90.0                                            | 90.0        | 90.0        | 90.0                  | 90.0                    | 90.0      | 90.0      | 90.0        |
| $\beta$ (deg)                | 147.7                   | 89.5       | 90.0                                            | 90.0        | 85.0        | 62.6                  | 90.0                    | 105.4     | 71.6      | 90.0        |
| $\gamma$ (deg)               | 90.0                    | 105.7      | 90.0                                            | 90.0        | 90.0        | 90.0                  | 90.0                    | 90.0      | 90.0      | 90.0        |

<sup>a</sup>*E* in kJ·mol<sup>-1</sup>·cell<sup>-1</sup>.

**Table S5** Unit cell parameters of the possible molecular packing of HNHAH in the ten possible space groups

| Space groups                 | Dreiding                |            |                                                 |             |             |                       |                         |           |           |             |
|------------------------------|-------------------------|------------|-------------------------------------------------|-------------|-------------|-----------------------|-------------------------|-----------|-----------|-------------|
|                              | <i>P2<sub>1</sub>/c</i> | <i>P-1</i> | <i>P2<sub>1</sub>2<sub>1</sub>2<sub>1</sub></i> | <i>Pbca</i> | <i>C2/c</i> | <i>P2<sub>1</sub></i> | <i>Pna2<sub>1</sub></i> | <i>C2</i> | <i>CC</i> | <i>Pbcn</i> |
| Z                            | 4                       | 2          | 4                                               | 8           | 8           | 2                     | 4                       | 4         | 4         | 8           |
| <i>E</i> <sup>a</sup>        | 177.39                  | 176.46     | 180.55                                          | 180.68      | 177.15      | 178.30                | 179.41                  | 177.76    | 177.92    | 181.39      |
| $\rho$ (g·cm <sup>-3</sup> ) | 2.068                   | 2.057      | 1.929                                           | 1.926       | 2.034       | 1.982                 | 1.948                   | 2.016     | 2.058     | 1.881       |
| <i>a</i> (Å)                 | 12.64                   | 9.22       | 7.32                                            | 7.72        | 12.25       | 7.37                  | 7.65                    | 12.21     | 7.34      | 30.30       |
| <i>b</i> (Å)                 | 28.53                   | 7.30       | 15.45                                           | 29.61       | 7.76        | 13.12                 | 13.26                   | 7.79      | 28.81     | 12.96       |
| <i>c</i> (Å)                 | 7.41                    | 14.46      | 13.17                                           | 13.04       | 40.25       | 9.44                  | 14.52                   | 15.74     | 7.40      | 7.77        |
| $\alpha$ (deg)               | 90.0                    | 107.1      | 90.0                                            | 90.0        | 90.0        | 90.0                  | 90.0                    | 90.0      | 90.0      | 90.0        |
| $\beta$ (deg)                | 148.7                   | 117.7      | 90.0                                            | 90.0        | 132.5       | 127.5                 | 90.0                    | 108.0     | 117.0     | 90.0        |
| $\gamma$ (deg)               | 90.0                    | 54.0       | 90.0                                            | 90.0        | 90.0        | 90.0                  | 90.0                    | 90.0      | 90.0      | 90.0        |

<sup>a</sup>*E* in kJ·mol<sup>-1</sup>·cell<sup>-1</sup>.

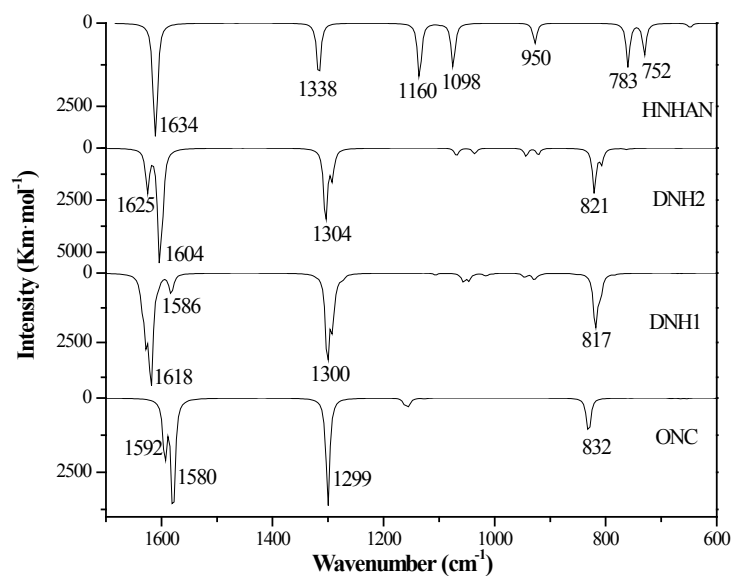

**Fig. S1** Calculated IR spectrums for DNH1, DNH2, HNHAH, and ONC.
